# Supplementary material
Source: publisher site journal article supplement (https://www.dovepress.com/article/482969)
Supplement: Supplementary file 1 [file get_supplementary_file.php]

**Supplementary data 1**

Resource equation method

According to resource equation method:

DF = N – k = kn – k = k(n – 1)

The acceptable range of degrees of freedom (DF) for the error term in an analysis of variance

(ANOVA) is between 10 to 20. Where N = total number of subjects, k = number of groups, and n = number of subjects per group.

By rearranging the formula, n is given as:

n = DF/k + 1

Based on the acceptable range of the DF, the DF in the formulas are replaced with the minimum (10) and maximum (20) DFs to obtain the minimum and maximum numbers of animals per group:

Minimum n = 10/k + 1

Maximum n = 20/k + 1

In this study, the effects of CAT were compared between two groups (Control group and CAT group), the sample sizes per group are

Minimum n = 10/2 + 1 = 6 = rounded up to 6 animals/group

Maximum n = 20/2 + 1 = 11 = rounded down to 11 animals/group.

In conclusion, for the proposed study, between 6 and 11 animals per group are required. Our research used 9 rats (n=9) in each group, which is the sample size calculated according resource equation method.

**Supplementary Table 1. The Weights of Rats in Each Group (g)**

| Day 0 | Number | Control group | CAT group |
| --- | --- | --- | --- |
|  | 1 | 170.1 | 170.7 |
|  | 2 | 181.6 | 173.4 |
|  | 3 | 174.0 | 174.5 |
|  | 4 | 175.8 | 187.6 |
|  | 5 | 179.0 | 179.8 |
|  | 6 | 180.5 | 183.6 |
|  | 7 | 173.7 | 181.0 |
|  | 8 | 182.7 | 182.1 |
|  | 9 | 185.1 | 172.6 |
|  | mean±SD | 180.8±2.9 | 181.1±4.5 |
|  | P-value | ns | |
| Day 14 |  | | |
|  | 1 | 254.1 | 255.8 |
|  | 2 | 261.4 | 261.4 |
|  | 3 | 262.3 | 258.0 |
|  | 4 | 268.9 | 262.6 |
|  | 5 | 263.2 | 268.4 |
|  | 6 | 263.5 | 260.2 |
|  | 7 | 271.0 | 265.9 |
|  | 8 | 264.4 | 267.7 |
|  | 9 | 262.6 | 269.3 |
|  | mean±SD | 265.6±3.2 | 265.7±3.3 |
|  | P-value | ns | |

Data are presented as mean ± SD. ‘ns’ indicates no significant difference (*P* > 0.05).

**Supplementary Table 2. The Movement Distance of Each Group (mm)**

| Number | Control group | CAT group |
| --- | --- | --- |
| 1 | 0.31 | 0.33 |
| 2 | 0.45 | 0.35 |
| 3 | 0.44 | 0.24 |
| 4 | 0.46 | 0.32 |
| 5 | 0.28 | 0.37 |
| 6 | 0.42 | 0.33 |
| 7 | 0.29 | 0.28 |
| 8 | 0.43 | 0.27 |
| 9 | 0.36 | 0.25 |
| mean±SD | 0.37±0.07 | 0.31±0.04 |
| P-value | * | |

Data are presented as mean ± SD. ‘*’ indicates significant difference (*P* < 0.05).
